# Supplementary material for: TP53 and CDKN2A mutations in patients with early-stage lung squamous cell carcinoma: an analysis of the correlations and prognostic outcomes
Source: PubMed Central journal article supplement — Ann Transl Med. 2021 Aug;9(16):1330. doi: 10.21037/atm-21-3709 (PMC8422115; doi:10.21037/atm-21-3709), 2021-08
Supplement: atm-09-16-1330-supplementary.pdf [file atm-09-16-1330-supplementary.pdf]

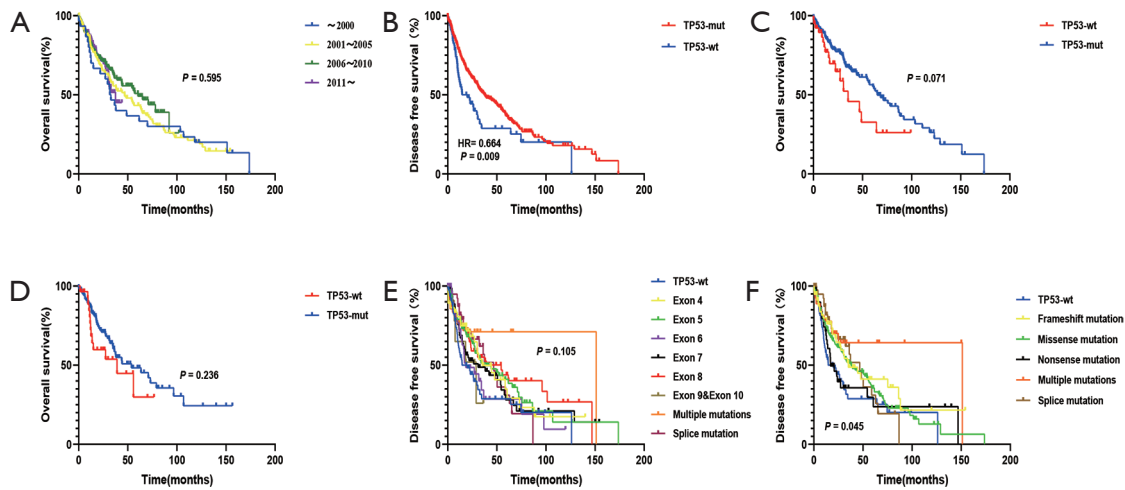

**Figure S1** Survival curves of patients carrying tumor protein p53 (TP53) mutations. (A) Overall survival (OS) of patients with different year of initial diagnosis according to tumor staging. (B) Disease free survival (DFS) in TP53 wild-type and mutated patients. (C) OS in stage I patients carrying wild-type or mutated TP53. (D) OS in stage II patients carrying wild-type or mutated TP53. (E) DFS in patients with wild-type and mutated TP53 subdivided according to mutation site. (F) DFS in patients with wild-type and mutated TP53 subdivided according to mutation type.

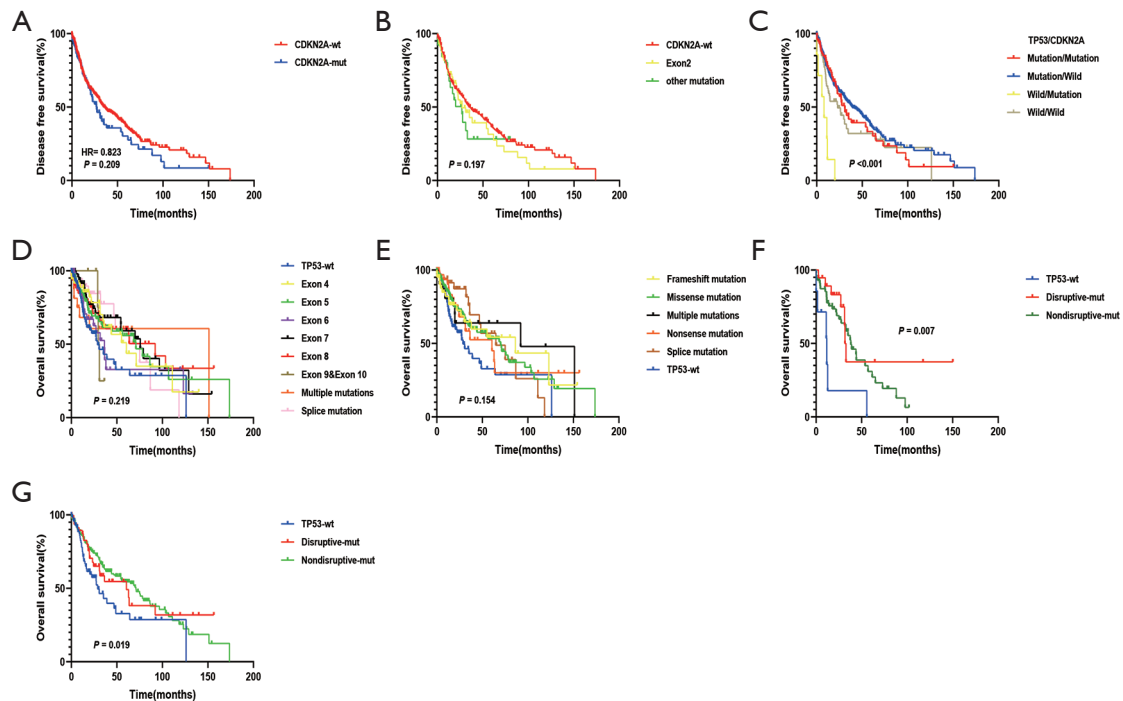

**Figure S2** Survival curves of patients carrying cyclin dependent kinase inhibitor 2A (CDKN2A) and tumor protein p53 (TP53) mutations. (A) Disease free survival (DFS) in patients with wild-type and mutated CDKN2A. (B) DFS in patients with wild-type and mutated CDKN2A subdivided according to mutation site. (C) DFS of patients in different CDKN2A/TP53 mutation groups. (D) Overall survival (OS) of different TP53 mutation sites in CDKN2A wild-type patients. (E) OS of different CDKN2A mutation types in CDKN2A wild-type patients. (F) OS of patients with wild-type and mutated TP53 subdivided into disruptive or nondisruptive mutations in CDKN2A-mutated patients. (G) OS of CDKN2A wild-type patients with wild-type and mutated TP53 subdivided into disruptive or nondisruptive mutations.

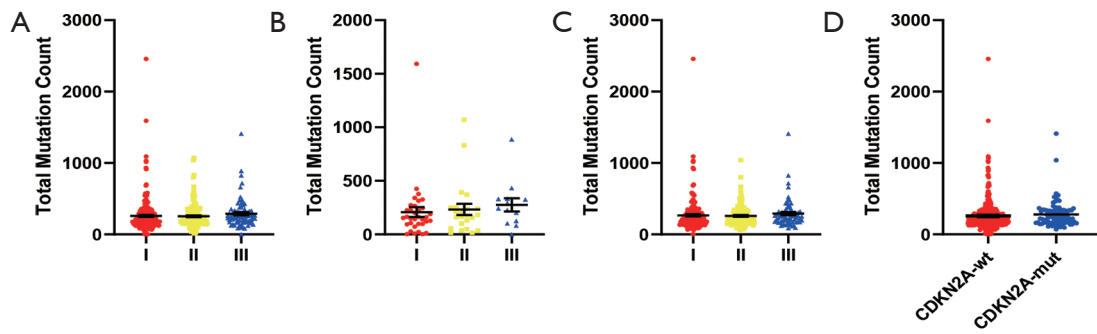

**Figure S3** The mutation counts of LUSC patients. (A) Total mutation count of patients with lung squamous cell carcinoma (LUSC) at different tumor stages. (B) Total mutation count of TP53 wild-type patients with LUSC at different tumor stages. (C) Total mutation count of TP53-mutated patients with LUSC at different tumor stages. (D) Total mutation count of LUSC patients with wild-type and mutated CDKN2A. For (A-D), each dot represents a patient [mean  $\pm$  standard deviation (SD)].

**Table S1** 1,021 gene panel

| whole exons |        |        |        |        |         |         |         |          |  |
|-------------|--------|--------|--------|--------|---------|---------|---------|----------|--|
| ABL1        | ABL2   | ACVR1B | AKT1   | AKT2   | AKT3    | ALK     | APC     | AR       |  |
| ARAF        | ARID1A | ARID1B | ARID2  | ASXL1  | ATM     | ATR     | ATRX    | AURKA    |  |
| AURKB       | AXIN1  | AXIN2  | AXL    | B2M    | BAP1    | BARD1   | BCL2    | BCL2L1   |  |
| BCOR        | BLM    | BMPR1A | BRAF   | BRCA1  | BRCA2   | BRD4    | BRIP1   | BTB      |  |
| C11orf30    | CASP8  | CBFB   | CBL    | CCND1  | CCND2   | CCND3   | CCNE1   | CD274    |  |
| CDC73       | CDH1   | CDK12  | CDK4   | CDK6   | CDK8    | CDKN1A  | CDKN1B  | CDKN2A   |  |
| CDKN2B      | CDKN2C | CEBPA  | CHEK1  | CHEK2  | CIC     | CREBBP  | CRKL    | CSF1R    |  |
| CTCF        | CTNNA1 | CTNNA1 | CUL3   | CYLD   | DAXX    | DDR1    | DDR2    | DICER1   |  |
| DNMT3A      | EGFR   | ELAC2  | EME2   | EP300  | EPAS1   | EPCAM   | EPHA2   | EPHA3    |  |
| EPHA5       | EPHB2  | EPHB6  | ERBB2  | ERBB3  | ERBB4   | ERCC1   | ERCC3   | ERG      |  |
| ERRFI1      | ESR1   | EXT1   | EXT2   | EZH2   | FAM123B | FAM175A | FANCA   | FANCC    |  |
| FANCD2      | FANCG  | FANCM  | FAS    | FAT1   | FAT2    | FBXW7   | FCGR2A  | FCGR3A   |  |
| FGFR1       | FGFR2  | FGFR3  | FGFR4  | FH     | FLCN    | FLT1    | FLT3    | FLT4     |  |
| FOXA1       | FOXL2  | FOXP1  | FUBP1  | GAB2   | GALNT12 | GATA3   | GNA11   | GNAQ     |  |
| GNAS        | GRIN2A | HDAC1  | HDAC4  | HGF    | HNF1A   | HOXB13  | HRAS    | HSP90AA1 |  |
| IDH1        | IDH2   | IFNG   | IFNGR1 | IGF1R  | IL7R    | INPP4B  | IRF2    | IRS2     |  |
| JAK1        | JAK2   | JAK3   | KDM5A  | KDM5C  | KDM6A   | KDR     | KEAP1   | KIT      |  |
| KRAS        | LRP1B  | MAP2K1 | MAP2K2 | MAP2K4 | MAP3K1  | MAPK1   | MAX     | MCL1     |  |
| MDM2        | MDM4   | MED12  | MEN1   | MET    | MITF    | MLH1    | MLH3    | MLL      |  |
| MLL2        | MLL3   | MPL    | MRE11A | MS4A1  | MSH2    | MSH3    | MSH6    | MTOR     |  |
| MUTYH       | MYC    | MYCL1  | MYCN   | MYD88  | NBN     | NCOR1   | NDUFA13 | NF1      |  |
| NF2         | NOTCH1 | NOTCH2 | NOTCH3 | NOTCH4 | NPM1    | NRAS    | NSD1    | NTHL1    |  |

**Table S1** (continued)

**Table S1** (continued)

| whole exons                                 |          |          |          |          |         |          |          |          |
|---------------------------------------------|----------|----------|----------|----------|---------|----------|----------|----------|
| NTRK1                                       | NTRK3    | PALB2    | PAX5     | PBRM1    | PCK1    | PDCD1LG2 | PDGFRA   | PDGFRB   |
| PDK1                                        | PHF6     | PIK3CA   | PIK3CB   | PIK3CG   | PIK3R1  | PIK3R2   | PMS1     | PMS2     |
| POLD1                                       | POLE     | POT1     | PPM1D    | PRKAR1A  | PTCH1   | PTCH2    | PTEN     | PTPN11   |
| RAD50                                       | RAD51    | RAD51B   | RAD51C   | RAD51D   | RAF1    | RARA     | RB1      | RBM10    |
| RET                                         | RHEB     | RHOA     | RICTOR   | RINT1    | RNASEL  | RNF43    | ROS1     | RPS6KB1  |
| RUNX1                                       | SDHA     | SDHAF2   | SDHB     | SDHC     | SDHD    | SERPINB3 | SERPINB4 | SETD2    |
| SLX4                                        | SMAD2    | SMAD4    | SMARCA4  | SMARCB1  | SMARCE1 | SMO      | SOX2     | SOX9     |
| SRC                                         | STAG2    | STAT3    | STK11    | SUFU     | SYK     | TBX3     | TCF7L2   | TET2     |
| TGFBR2                                      | TMEM127  | TMPRSS2  | TNFAIP3  | TOP1     | TOP2A   | TP53     | TP73     | TSC1     |
| TSC2                                        | VEGFA    | VHL      | WT1      | XPO1     | XRCC2   | XRCC3    | ZFHX3    | ZMAT3    |
| intron, promoter, fusion points/breakpoints |          |          |          |          |         |          |          |          |
| ALK                                         | BCL2L11  | BRAF     | BRCA1    | BRD4     | CD74    | EGFR     | EML4     | ERG      |
| ETV6                                        | EZR      | FGFR1    | FGFR2    | FGFR3    | KIF5B   | KIT      | MAML2    | MET      |
| MSH2                                        | MYC      | MYCL1    | NCOA4    | NOTCH2   | NTRK1   | NTRK2    | NTRK3    | PDGFRA   |
| PMS2                                        | PPARG    | RAF1     | RET      | ROS1     | RSPO2   | SLC34A2  | TERT     | TFE3     |
| TMPRSS2                                     | TPM3     |          |          |          |         |          |          |          |
| partial exons                               |          |          |          |          |         |          |          |          |
| ABCA13                                      | ABCB1    | ABCC1    | ABCC11   | ABCC2    | ABCG2   | ACACA    | ACIN1    | ACTB     |
| ACTG1                                       | ACTG2    | ACVR2A   | ACVRL1   | ADAM29   | ADAMTS5 | ADCY1    | AFF1     | AFF2     |
| AFF3                                        | AFF4     | AHNAK    | AKAP9    | ALB      | AMOT    | ANGPT1   | ANK3     | ANKRD27  |
| ANKRD30A                                    | ANKRD30B | ANKRD36B | APEX1    | APOBEC3B | ARAP3   | ARFGEF1  | ARFGEF2  | ARHGAP26 |
| ARHGAP29                                    | ARHGAP35 | ARID4B   | ARNT     | ASCL4    | ASH1L   | ASMTL    | ASPM     | ASTN1    |
| ASXL2                                       | ATIC     | ATP12A   | ATP11B   | ATP1A1   | ATP2B3  | BAZ2B    | BBS9     | BCAS1    |
| BCL11A                                      | BCL11B   | BCL2A1   | BCL2L11  | BCL3     | BCL9    | BCLAF1   | BCORL1   | BCR      |
| BIRC2                                       | BIRC3    | BMPR2    | BNC2     | BPTF     | BRD2    | BRD3     | BRSK1    | BRWD1    |
| BTLA                                        | BUB1     | C15orf23 | C15orf55 | C1QA     | C1S     | C3orf70  | C7orf53  | C8orf34  |
| CACNA1D                                     | CACNA1E  | CADM2    | CAMTA1   | CAPN7    | CARD11  | CASP1    | CASQ2    | CBLB     |
| CBR1                                        | CBR3     | CCDC168  | CCNA1    | CCNB3    | CCT3    | CCT5     | CCT6B    | CD22     |
| CD33                                        | CD5L     | CDA      | CDH11    | CDH18    | CDH23   | CDK13    | CHD1     | CHD1L    |
| CHD3                                        | CHD4     | CHD6     | CHD8     | CHD9     | CHFR    | CHI3L1   | CHN1     | CIITA    |
| CKS1B                                       | CLCC1    | CLDN18   | CLP1     | CLSPN    | CLTC    | CNOT3    | CNOT4    | CNTN1    |
| CNTN5                                       | CNTNAP1  | CNTNAP5  | COL1A1   | COL2A1   | COL5A1  | COL5A2   | COL5A3   | COPS2    |
| CPS1                                        | CREB3L1  | CRIPAK   | CRLF2    | CRNKL1   | CRTC1   | CRYBG3   | CSF1     | CSF3R    |
| CSMD1                                       | CSMD3    | CSNK1A1  | CSNK1G3  | CSNK2A1  | CTLA4   | CTNNA2   | CTNND1   | CUX1     |
| CYBA                                        | CYP19A1  | CYP1B1   | CYP1A1   | CYP2A13  | CYP2C19 | CYP2C8   | CYP2D6   | CYP3A4   |

**Table S1** (continued)

**Table S1** (*continued*)

| whole exons |           |           |           |           |           |           |           |           |
|-------------|-----------|-----------|-----------|-----------|-----------|-----------|-----------|-----------|
| CYP3A5      | DCC       | DDX3X     | DDX5      | DEK       | DHX35     | DHX9      | DIAPH1    | DIS3L2    |
| DLC1        | DMD       | DNAH6     | DNAJC11   | DNM2      | DNMT1     | DOCK2     | DOCK7     | DOT1L     |
| DPYD        | DRGX      | DTX1      | DUSP22    | DYSF      | EBF1      | ECT2L     | EEF1A1    | EGR3      |
| EIF2AK3     | EIF2C3    | EIF3A     | EIF4G3    | ELF1      | ELF3      | ELF4      | ELL       | ELMO1     |
| ELN         | EMID2     | EPC1      | EPHA1     | EPHA4     | EPHA7     | EPHB1     | EPHB4     | EPOR      |
| EPPK1       | EPS15     | ERBB2IP   | ERCC2     | ESR2      | ETS1      | ETV1      | ETV5      | ETV6      |
| EWSR1       | EZR       | F8        | FAM131B   | FAM135B   | FAM157B   | FAM22A    | FAM46C    | FAM5C     |
| FAP         | FASLG     | FAT3      | FAT4      | FCGR1A    | FCGR2B    | FCRL4     | FGF10     | FGF14     |
| FGF23       | FGF3      | FGF4      | FGF6      | FKBP5     | FLG       | FLI1      | FLNC      | FMN2      |
| FMR1        | FN1       | FNDC4     | FOXA2     | FOXO3     | FOXQ1     | FRG1      | FRMPD4    | FUS       |
| FXR1        | FYN       | FZD1      | G3BP1     | G3BP2     | GABRA6    | GATA2     | GFRAL     | GIGYF1    |
| GKN2        | GLB1L3    | GLI1      | GLI2      | GLI3      | GMPS      | GNA12     | GNA13     | GNG2      |
| GPC3        | GPR124    | GPX1      | GRB7      | GRM3      | GSK3B     | GSTM5     | GSTP1     | GUSB      |
| H3F3A       | H3F3C     | HCLS1     | HCN1      | HDAC9     | HECW1     | HERC2     | HEY1      | HIP1      |
| HIST1H1C    | HIST1H1D  | HIST1H1E  | HIST1H2AC | HIST1H2AG | HIST1H2AL | HIST1H2AM | HIST1H2BC | HIST1H2BD |
| HIST1H2BJ   | HIST1H2BK | HIST1H2BO | HIST1H3B  | HIST1H4I  | HLF       | HMCN1     | HNRPDL    | HOXA11    |
| HOXA13      | HOXA3     | HOXA9     | HOXC13    | HOXD11    | HOXD13    | HSD3B1    | HSD3B2    | HSP90AB1  |
| HSPA8       | HSPD1     | HSPH1     | ICK       | IFITM1    | IFITM3    | IGF2      | IGF2R     | IGLL5     |
| IGSF10      | IKBKE     | IKZF1     | IKZF2     | IKZF3     | IL1RAPL1  | IL21R     | IL6       | IL6ST     |
| IMPG1       | ING1      | INHBA     | INPP4A    | INPP5D    | INPPL1    | IRF4      | IRF6      | ITGB3     |
| ITK         | ITSN1     | JARID2    | KALRN     | KAT6A     | KAT6B     | KCNJ5     | KCNQ2     | KDM2B     |
| KDM3B       | KEL       | KIF5B     | KLB       | KLF4      | KLHL6     | KLK1      | KRTAP5-5  | L3MBTL1   |
| LAMA2       | LCP1      | LEF1      | LGALS8    | LIFR      | LPHN2     | LPP       | LRP2      | LRP4      |
| LRP5        | LRP6      | LRRC7     | LRRK2     | LYN       | LZTS1     | MACF1     | MAD1L1    | MAGI2     |
| MAGOH       | MAML2     | MAML3     | MAP3K13   | MAPK3     | MCC       | MCM3      | MDH2      | MECOM     |
| MEF2C       | MGA       | MIB1      | MIOS      | MKI67     | MKL1      | MLL4      | MLLT3     | MLLT6     |
| MMP2        | MMP11     | MN1       | MNDA      | MNX1      | MPO       | MSH4      | MSN       | MSR1      |
| MTHFR       | MTRR      | MUC5B     | MYB       | MYBL2     | MYH10     | MYH11     | MYH14     | MYH9      |
| MYO3A       | NAP1L1    | NAV3      | NBPF1     | NCAM2     | NCF2      | NCF4      | NCK1      | NCOA2     |
| NCOR2       | NCSTN     | NDRG1     | NEB       | NFATC4    | NFE2L2    | NFE2L3    | NIN       | NKX3-1    |
| NLRC3       | NOD1      | NOS3      | NQO1      | NR1I2     | NR2F2     | NR4A2     | NRP2      | NRXN1     |
| NTM         | NTRK2     | NUMA1     | NUP107    | NUP210    | NUP98     | OBSCN     | OGDH      | OMD       |
| OPCML       | OR11G2    | OR2T4     | OR4A15    | OR4C6     | OR5L2     | OR6F1     | P2RY8     | P4HB      |
| PABPC1      | PABPC3    | PAG1      | PAK1      | PAK3      | PARK2     | PARP1     | PASK      | PAX3      |

**Table S1** (*continued*)

**Table S1** (*continued*)

| whole exons       |         |          |        |          |          |           |          |         |
|-------------------|---------|----------|--------|----------|----------|-----------|----------|---------|
| PAX7              | PBX1    | PC       | PCDH18 | PCLO     | PCSK6    | PCSK7     | PDCD1    | PDCD11  |
| PDE4DIP           | PDGFB   | PDILT    | PER1   | PGR      | PHF1     | PIK3C2A   | PIK3C2B  | PIK3C2G |
| PIK3R3            | PIP5K1A | PKD1L2   | PKHD1  | PLAC8    | PLAG1    | PLCB1     | PLCG1    | PLCG2   |
| PLK1              | PLXNA1  | PLXNB2   | POLQ   | POLR2B   | POM121   | POM121L12 | POTEG    | POU2AF1 |
| PPP1R17           | PPP2R1A | PPP6C    | PRAM1  | PRDM1    | PRDM16   | PREX2     | PRF1     | PRKAA1  |
| PRKCB             | PRKCI   | PRKDC    | PRRX1  | PRX      | PSG2     | PSIP1     | PSMB1    | PSMB5   |
| PTGS1             | PTGS2   | PTK2     | PTPN13 | PTPN2    | PTPRB    | PTPRD     | PTPRF    | PTPRJ   |
| PTPRK             | PTPRO   | PTPRT    | PTPRU  | RAB35    | RAC1     | RAC2      | RAD21    | RAD54B  |
| RANBP2            | RASA1   | RASGRP1  | RBL1   | RECQL4   | REL      | RELN      | RFC1     | RGS3    |
| RHOH              | RHOT1   | RIT1     | RNF213 | ROBO1    | ROBO2    | ROBO3     | ROCK1    | RPGR    |
| RPL22             | RPTOR   | RSPO2    | RSPO3  | RUNX1T1  | RUNX2    | RXRA      | RYR1     | RYR2    |
| SBDS              | SCUBE2  | SEC31A   | SEMA3A | SEMA3E   | SEMA6A   | SERP2     | SERPINA7 | SETBP1  |
| SETDB1            | SF1     | SF3A1    | SF3A3  | SF3B1    | SFPQ     | SGCZ      | SH3PXD2A | SHH     |
| SI                | SIN3A   | SLC16A1  | SLC1A2 | SLC22A16 | SLC22A18 | SLC22A2   | SLC22A3  | SLCO1B3 |
| SLIT1             | SLIT2   | SMAD3    | SMC1A  | SMC1B    | SMURF2   | SNCAIP    | SNTG1    | SNX29   |
| SOD2              | SOS1    | SOX10    | SOX17  | SPEN     | SPOP     | SPRR3     | SPSB4    | SPTA1   |
| SRD5A2            | SRGAP1  | SRGAP3   | SRSF2  | SRSF7    | SSX1     | STAG1     | STAT1    | STAT5A  |
| SUCLG1            | SUCLG2  | SULT1A1  | SUZ12  | SVEP1    | SYNCRIP  | SYNE1     | TAF1     | TAF15   |
| TAF1L             | TAL1    | TBL1XR1  | TBX15  | TBX22    | TCEB1    | TCERG1    | TCF12    | TCF3    |
| TCF4              | TCL1A   | TCP11    | TEC    | TENM3    | TERT     | TFDP1     | TFDP2    | TFE3    |
| TGFBR1            | TGFBR3  | TGM2     | THBS1  | THBS2    | THRAP3   | TJP1      | TLE1     | TLL2    |
| TLR4              | TLX3    | TMEM132D | TNN    | TNPO1    | TOP2B    | TP53BP1   | TP63     | TPM3    |
| TPR               | TRAF5   | TRERF1   | TRIM24 | TRIM58   | TRIO     | TRPC5     | TRRAP    | TSHR    |
| TSHZ2             | TSHZ3   | TTF1     | TTL    | TUBA3C   | TUBB3    | TUSC3     | TXNIP    | TYMS    |
| TYR               | TYRP1   | U2AF1    | UBE2D2 | UBR5     | UGT1A1   | UMPS      | UPF3B    | USH2A   |
| USP6              | USP8    | VDAC2    | VEZF1  | VIM      | WASF3    | WDR90     | WDTC1    | WHSC1   |
| WHSC1L1           | WIPF1   | WNK1     | WNT5A  | WSCD2    | WWOX     | WWP1      | WWP2     | XBP1    |
| XPC               | XRCC1   | YBX1     | YY1AP1 | ZBTB16   | ZC3H11A  | ZFP36L1   | ZFP36L2  | ZFPM2   |
| ZIC3              | ZNF217  | ZNF384   | ZNF521 | ZNF638   | ZNF750   | ZNF804B   | ZNF814   |         |
| germline mutation |         |          |        |          |          |           |          |         |
| ATM               | BRCA1   | BRCA2    | MLH1   | MLH3     | MSH2     |           |          |         |
| MSH3              | MSH6    | PALB2    | PMS1   | PMS2     |          |           |          |         |

**Table S2** Patient and tumor characteristics according to TP53 status

| Variable           | N   | TP53 status      |             | P value |
|--------------------|-----|------------------|-------------|---------|
|                    |     | Mutation (n=409) | Wild (n=83) |         |
| Age (years)        |     |                  |             |         |
| <60                | 89  | 74               | 15          | 0.452   |
| 60-70              | 204 | 174              | 30          |         |
| >70                | 190 | 153              | 37          |         |
| Unknown            | 9   | 8                | 1           |         |
| Sex                |     |                  |             |         |
| Male               | 363 | 307              | 56          | 0.152   |
| Female             | 129 | 102              | 27          |         |
| Lymph node status  |     |                  |             |         |
| pN0                | 316 | 265              | 51          | 0.695   |
| pN1                | 130 | 105              | 25          |         |
| pN2/N3             | 46  | 39               | 7           |         |
| Tumor              |     |                  |             |         |
| T1                 | 110 | 87               | 23          | 0.355   |
| T2                 | 288 | 245              | 43          |         |
| T3                 | 70  | 59               | 11          |         |
| T4                 | 24  | 18               | 6           |         |
| Tumor stage        |     |                  |             |         |
| I                  | 239 | 198              | 41          | 0.682   |
| II                 | 160 | 132              | 28          |         |
| III                | 86  | 72               | 14          |         |
| IV                 | 7   | 7                | 0           |         |
| Primary Tumor Site |     |                  |             |         |
| L-Upper            | 131 | 105              | 26          | 0.308   |
| L-Lower            | 77  | 62               | 15          |         |
| R-Upper            | 128 | 107              | 21          |         |
| R-Middle           | 17  | 12               | 5           |         |
| R-Lower            | 108 | 96               | 12          |         |
| Bronchial          | 10  | 9                | 1           |         |
| Unknown            | 21  | 18               | 3           |         |

Table S2 (continued)

Table S2 (continued)

| Variable                         | N   | TP53 status      |             | P value |
|----------------------------------|-----|------------------|-------------|---------|
|                                  |     | Mutation (n=409) | Wild (n=83) |         |
| Year Initial Diagnosis           |     |                  |             |         |
| -2000                            | 30  | 24               | 6           | 0.583   |
| 2001-2005                        | 96  | 85               | 11          |         |
| 2006-2010                        | 182 | 151              | 31          |         |
| 2011-                            | 167 | 135              | 32          |         |
| Unknown                          | 17  | 14               | 3           |         |
| Surgical Margin Resection Status |     |                  |             |         |
| R0                               | 390 | 326              | 64          | 0.862   |
| R1+R2                            | 17  | 14               | 3           |         |
| Unknown                          | 85  | 69               | 16          |         |
| CDKN2A Mutation status           |     |                  |             |         |
| Wild type                        | 406 | 331              | 75          | 0.040   |
| Mutated type                     | 86  | 78               | 8           |         |

**Table S3** Patient and tumor characteristics according to CDKN2A status

| Variable                  | N   | CDKN2A status   |              | P value |
|---------------------------|-----|-----------------|--------------|---------|
|                           |     | Mutation (n=86) | Wild (n=406) |         |
| <b>Age (years)</b>        |     |                 |              |         |
| <60                       | 89  | 20              | 69           | 0.553   |
| 60-70                     | 210 | 34              | 176          |         |
| >70                       | 184 | 30              | 154          |         |
| Unknown                   | 9   | 2               | 7            |         |
| <b>Sex</b>                |     |                 |              |         |
| Male                      | 363 | 65              | 298          | 0.418   |
| Female                    | 129 | 21              | 108          |         |
| <b>Lymph node status</b>  |     |                 |              |         |
| pN0                       | 316 | 53              | 263          | 0.225   |
| pN1                       | 130 | 28              | 102          |         |
| pN2/N3                    | 46  | 5               | 41           |         |
| <b>Tumor</b>              |     |                 |              |         |
| T1                        | 110 | 17              | 93           | 0.844   |
| T2                        | 288 | 53              | 235          |         |
| T3                        | 70  | 11              | 59           |         |
| T4                        | 24  | 5               | 19           |         |
| <b>Tumor stage</b>        |     |                 |              |         |
| I                         | 239 | 38              | 201          | 0.344   |
| II                        | 160 | 34              | 126          |         |
| III                       | 86  | 12              | 74           |         |
| IV                        | 7   | 2               | 5            |         |
| <b>Primary Tumor Site</b> |     |                 |              |         |
| L-Upper                   | 131 | 20              | 111          | 0.332   |
| L-Lower                   | 77  | 13              | 64           |         |
| R-Upper                   | 128 | 22              | 106          |         |
| R-Middle                  | 17  | 1               | 16           |         |
| R-Lower                   | 108 | 20              | 88           |         |
| Bronchial                 | 10  | 3               | 7            |         |
| Unknown                   | 21  | 7               | 14           |         |
